# Supplementary material
Source: MDPI journal article supplement (https://www.mdpi.com/2073-4441/13/18/2490)
Supplement: s1 [file s1]

# Spatiotemporal Variation of Water Supply and Demand Balance under Drought Risk and Its Relationship with Maize Yield: A Case Study in Midwestern Jilin Province, China

Yining Ma <sup>1,2,3</sup>, Jiquan Zhang <sup>1,2,3</sup>, Chunli Zhao <sup>4</sup>, Kaiwei Li <sup>1,2,3</sup>, Shuna Dong <sup>5</sup>,  
Xingpeng Liu <sup>1,2,3</sup> and Zhijun Tong <sup>1,2,3,\*</sup>

<sup>1</sup> School of Environment, Northeast Normal University, Changchun 130024, China;

mayn818@nenu.edu.cn (Y.M.); zhangjq022@nenu.edu.cn (J.Z.);  
likw395@nenu.edu.cn (K.L.); liuxp912@nenu.edu.cn (X.L.)

<sup>2</sup> State Environmental Protection Key Laboratory of Wetland Ecology and Vegetation Restoration, Northeast Normal University, Changchun 130024, China

<sup>3</sup> Key Laboratory for Vegetation Ecology, Ministry of Education, Changchun 130024, China

<sup>4</sup> School of Horticulture, Jilin Agricultural University, No.2888 Xincheng Street, Nanguan, Changchun 130117, China; zhaochunli@jlau.edu.cn

<sup>5</sup> College of Urban and Environmental Sciences, Changchun Normal University, Changchun 130032, China; dongsn@126.com

\* Correspondence: gis@nenu.edu.cn

**Table:**

**Table S1** Information of 33 global climate models from CMIP5

| Code | Model groups | Research Institutions    | Code | Model groups   | Research Institutions    |
|------|--------------|--------------------------|------|----------------|--------------------------|
| a    | OBVERSATION  | NMIC, China              | r    | GISS-E2-H-CC   | NASA GISS, USA           |
| b    | ACCESS1-0    | CSIRO and BoM, Australia | s    | GISS-E2-R      | NASA GISS, USA           |
| c    | ACCESS1-3    | CSIRO and BoM, Australia | t    | GFDL-CM3       | NOAA GFDL, USA           |
| d    | BCC-CSM1-1   | BCC, CMA, China          | u    | GFDL-ESM2G     | NOAA GFDL, USA           |
| e    | BCC-CSM1-1-m | BCC, CMA, China          | v    | GFDL-ESM2M     | NOAA GFDL, USA           |
| f    | BNU-ESM      | GCESS, China             | w    | HadGEM2-AO     | NIMR/KMA, South Korea/UK |
| g    | CanESM2      | CCCMA, Canada            | x    | INM-CM4        | INM, Russia              |
| h    | CCSM4        | NCAR, USA                | y    | IPSL-CM5A-LR   | IPSL, France             |
| i    | CESM1-BGC    | NSF-DOE-NCAR, USA        | z    | IPSL-CM5A-MR   | IPSL, France             |
| j    | CESM1-CAM5   | NSF-DOE-NCAR, USA        | A    | IPSL-CM5B-LR   | IPSL, France             |
| k    | CESM1-WACCM  | NSF-DOE-NCAR, USA        | B    | MIROC5         | MIROC, Japan             |
| l    | CMCC-CM      | CMCC, Italy              | C    | MIROC-ESM      | MIROC, Japan             |
| m    | CMCC-CMS     | CMCC, Italy              | D    | MIROC-ESM-CHEM | MIROC, Japan             |
| n    | CNRM-CM5     | CNRM-GAME, France        | E    | MPI-ESM-LR     | MPI-M, Germany           |
| o    | EC-EARTH     | ICHEC, Europe            | F    | MRI-CGCM3      | MRI, Japan               |
| p    | FIO-ESM      | FIO, China               | G    | NorESM1-M      | NCC, Norway              |
| q    | GISS-E2-H    | NASA GISS, USA           | H    | NorESM1-ME     | NCC, Norway              |

**Table:****Sen's slope:**

Sen's slope is used to calculate the extent of temporal trends in climate factors [1]. The Sen's slope is widely used in meteorological and hydrological research because it avoids the effects of missing time series data and data distribution patterns on the analysis results, and because it eliminates outliers from interfering with the time series [2,3].

Assuming a time series with  $n$  statistics ( $x_1, x_2, \dots, x_n$ ), Sen's slope is calculated as:

$$\beta = \text{Median} \left( \frac{x_j - x_i}{j - i} \right), \forall j > i \quad (1)$$

where, Median is the median function.  $\beta$  is used to determine the degree of time series trend,  $\beta > 0$  means positive trend,  $\beta < 0$  means negative trend,  $\beta = 0$  means insignificant trend, the value of  $\beta$  is the degree of trend.

**References**

- [1] Sen, P.K. Estimates of the Regression Coefficient Based on Kendall's Tau. J. Am. Stat. Assoc. 1968, 63, 1379-1389. <https://doi.org/10.1080/01621459.1968.10480934>
- [2] Gocic, M., Trajkovic, S. Analysis of changes in meteorological variables using Mann-Kendall and Sen's slope estimator statistical tests in Serbia. Global. Planet. Change. 2013, 100, 172-182. <https://doi.org/10.1016/j.gloplacha.2012.10.014>
- [3] Chatterjee, S., Khan, A., Akbari, H., Wang, Y. Monotonic trends in spatio-temporal distribution and concentration of monsoon precipitation (1901–2002), West Bengal, India. Atmos. Res. 2016, 182, 54-75. <https://doi.org/10.1016/j.atmosres.2016.07.010>

**Table S2.** M-K test and Sen's slope of variable for different periods

| Period         | Variable | MK-Z value | Sen's slope | Trends |
|----------------|----------|------------|-------------|--------|
| <b>Current</b> | CWDI     | 1.97*      | 0.125       | ↑      |
|                | ET0      | -1.32      | -0.592      | ↓      |
|                | Etc      | -1.22      | -0.483      | ↓      |
|                | Pe       | -0.43      | -0.517      | ↓      |
|                | IRI      | 1.29       | 0.201       | ↑      |
| <b>RCP4.5</b>  | CWDI     | -0.14      | -0.023      | ↓      |
|                | ET0      | -0.48      | -0.451      | ↓      |
|                | Etc      | -0.78      | -0.494      | ↓      |
|                | Pe       | 0.54       | 0.742       | ↑      |
|                | IRI      | -1.09      | -0.361      | ↓      |
| <b>RCP8.5</b>  | CWDI     | 0.48       | 0.057       | ↑      |
|                | ET0      | 2.82**     | 2.065       | ↑      |
|                | Etc      | 3.26**     | 1.78        | ↑      |
|                | Pe       | -1.8+      | -2.603      | ↓      |
|                | IRI      | 1.46       | 0.347       | ↑      |

Note "+", "\*\*" and "\*\*\*" indicate that they passed the 0.1, 0.05 and 0.01 significance tests, respectively.

Figure:

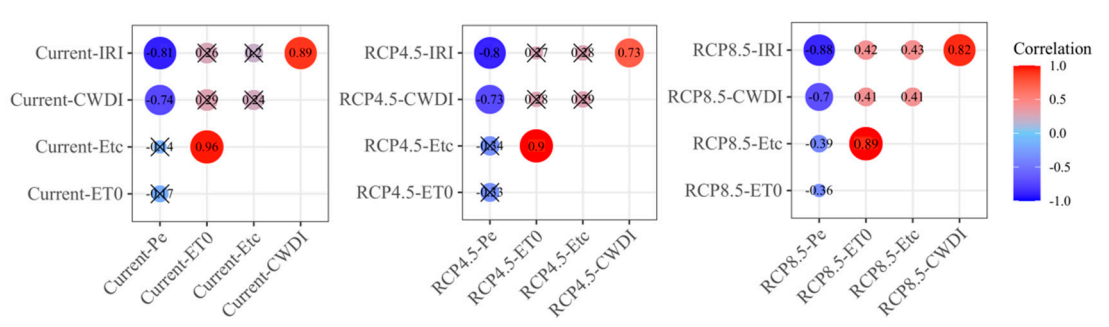

Figure S1. Correlation of various statistics for different periods (Current, RCP 4.5, RCP 8.5)
